# Supplementary material for: Colloidal gold-based immunochromatographic biosensor for quantitative detection of S100B in serum samples
Source: Royal Society of Chemistry journal article supplement (doi:10.1039/d3nh00192j), 2023-01-01
Supplement: d3nh00192j1.pdf [file d3nh00192j1.pdf]

*Supporting information*

**Colloidal gold-based immunochromatographic biosensor for  
quantitative detection of S100B in serum samples**

## Contents

**Figure S1.** Characterization of colloidal gold: (A) UV-Vis absorption spectra, (B) TEM image.

**Figure S2.** The state of colloidal gold at different (A) pH value and (B) antibody labeling amount.

**Table S1.** Recovery results for S100B spiked in serum samples.

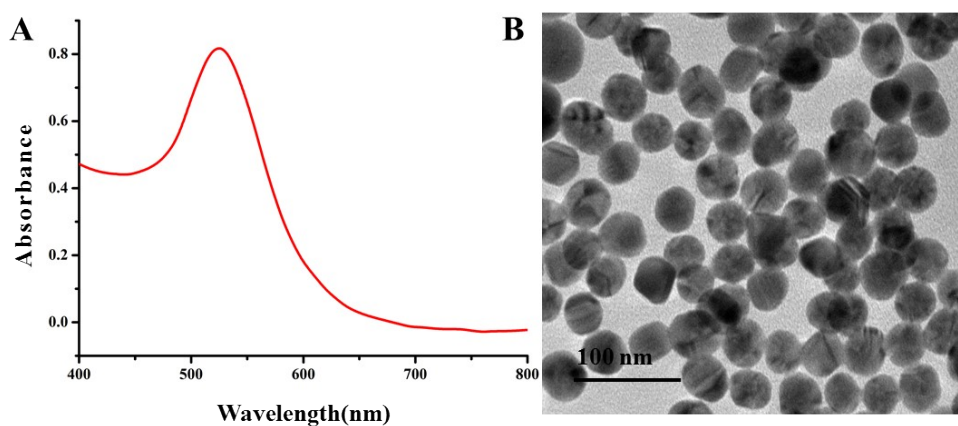

**Figure S1.** Characterization of colloidal gold: (A) UV-Vis absorption spectra, (B) TEM image.

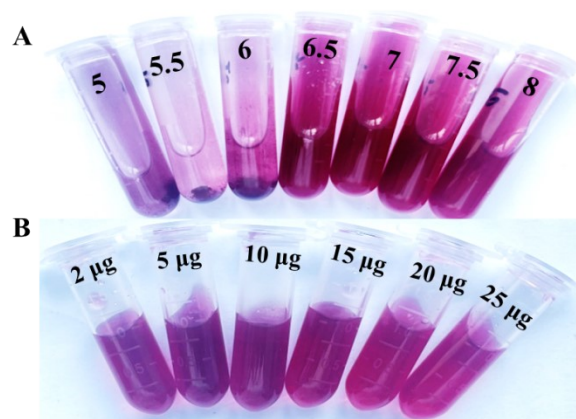

**Figure S2.** The state of colloidal gold at different (A) pH value and (B) antibody labeling amount.

**Table S1.** Recovery results for S100B spiked in serum samples.

| Target           | Added concentration | Detected concentration | Recovery (%) | CV (%) |
|------------------|---------------------|------------------------|--------------|--------|
| S100B<br>(ng/mL) | 100                 | 102.8                  | 102.8        | 4.5    |
|                  | 10                  | 9.6                    | 96.0         | 3.7    |
|                  | 1                   | 1.1                    | 110.0        | 4.7    |
